# Supplementary material
Source: publisher site journal article supplement (https://static.cambridge.org/content/id/urn:cambridge.org:id:article:S0007114519000783/resource/name/S0007114519000783supp001.docx)
Supplement: Supplementary file 1 [file S0007114519000783supp001.docx]

**Supplementary table S1** Plasma Hcy concentration before and after the folic acid intervention

|  | Success group  (n=325) | |  | Failure group  (n=313) | |  |  |
| --- | --- | --- | --- | --- | --- | --- | --- |
| Variables | Mean | SD |  | Mean | SD | *t* | *P* |
| Hcy (before intervention), (μmol/L) | 20.17 | 6.36 |  | 24.28 | 9..72 | -6.34 | <0.001 |
| Hcy (after intervention), (μmol/L) | 12.29 | 1.76 |  | 20.46 | 6.17 | -22.92 | <0.001 |

Hcy, homocysteine; SD, standard deviation
